# Supplementary material for: ANDROMEDA – Eine Untersuchung von Einflussfaktoren auf die Adhärenz von Patienten mit neovaskulärer altersabhängiger Makuladegeneration mithilfe des neu konzipierten Patientenfragebogens LAF-IVT
Source: Springer Nature journal article supplement (doi:10.1007/s00347-019-01005-4), 2019-11-12
Supplement: MOESM3 [file 17378188]

## **LAF-IVT**

**„Patient Questionnaire for Longitudinal assessment of Adherence Factors  
to Intravitreal (anti-VEGF) Therapy”**

**„Patientenfragebogen zur Bestimmung von Faktoren, die die  
Adhärenz/Persistenz bei der Therapie mit Aflibercept als intravitreale  
Injektion beeinflussen”**

© Bayer

## Patientenfragebogen zur Bestimmung von Faktoren, die die Adhärenz/ Persistenz bei der Therapie mit Aflibercept als intravitreale Injektion beeinflussen

*Lieber Interviewer, bei "Patient weiß es nicht" kann von einer ungestützten Antwortmöglichkeit ausgegangen werden. Wählen Sie ungestützte Antwortmöglichkeiten nur aus, wenn der Befragte keine der anderen Antwortmöglichkeiten auswählen kann.*

### Befragung bei Baseline

- 1) Erhalten Sie aktuell Spritzen ins Auge?       Nein       Ja       Ungestützt: Patient weiß es nicht / macht keine Angaben

*Interviewer-Hinweis:  
Sollte ein Patient bereits an dieser Stelle "Nein" antworten  
1) sicherstellen, dass der Patient tatsächlich keine Spritzen bekommt: umschreiben mit "ein Medikament, das durch eine Operation ins Auge verabreicht wird"  
2) wenn weiter verneint wäre das Interview zunächst nicht fortzuführen und IDS umgehend zu informieren.*

- 2) Leiden Sie neben der Erkrankung Ihres Auges/Ihrer Augen noch an anderen Erkrankungen, aufgrund derer Sie dauerhaft behandelt werden müssen?       Nein *weiter mit 3)*       Ja       Ungestützt: Patient weiß es nicht / macht keine Angaben

*Wenn Ja, bitte alles Zutreffende ankreuzen*

- Bluthochdruck
- Diabetes (Zuckerkrankheit)
- Herzkrankheit (z.B. Probleme an Herzkranzgefäßen)
- Schilddrüsenerkrankung
- Depression
- Gelenkerkrankungen (z.B. Arthrose, Arthritis)

**Telefonanruf nach Initialvisite**

- Sonstige Erkrankungen? Welche?

EDC-Hinweis: als Log line umsetzen

**Organisation der Termine/Behandlung**

- 3) Wie lange hat es gedauert bis Sie die erste Spritze ins Auge erhalten haben, nachdem Ihr Augenarzt festgestellt hat, dass Sie Spritzen ins Auge brauchen?
- Tage  
 Wochen  
 Monate

Ungestützt: Patient kann es nicht genau abschätzen

*Interviewer-Hinweis: In diesem Fall bitte zunächst folgende Antwortmöglichkeiten vorgeben:*

EDC-Hinweis: folgende Antworten nur anzeigen, wenn "Ungestützt: Patient kann es nicht genau abschätzen" ausgewählt wurde

- Nur wenige Tage     
  circa 1-2 Wochen     
  circa 2-4 Wochen     
  mehr als 4 Wochen
- Ungestützt: Patient weiß es nicht / macht keine Angaben

- 4) Hat die Praxis oder Klinik, in der Sie die Spritzen ins Auge erhalten, die ersten Termine zur Spritzengabe im Voraus vereinbart/vergeben?
- Nein *weiter mit 5)*     
  Ja     
  Ungestützt: Patient weiß es nicht / macht keine Angaben

Wenn Ja, wie viele Spritzentermine wurden vorab geplant

Ungestützt: Patient weiß es nicht / macht keine Angabe

**Informationen zur Erkrankung / Behandlung**

- 5) Wurden Sie über Ihre Behandlung aufgeklärt, wurden Ihnen also z. B. das Verfahren der Behandlung/der Spritzengabe, der Nutzen, oder mögliche Risiken besprochen?
- Nein, *weiter mit 9)*     
  Ja     
  Ungestützt: Patient weiß es nicht / macht keine Angaben

- 6) Wer hat Sie hauptsächlich über Ihre Erkrankung, Behandlungsmöglichkeiten, Behandlungsverfahren informiert?
- (a) Arzt in der Praxis oder Klinik, in der Sie Ihre Spritzen ins Auge erhalten  
 (b) anderer Augenarzt  
 (c) Krankenschwester/Arzthelfer(in) in der Praxis oder Klinik, in der Sie Ihre Spritzen ins Auge erhalten

EDC-Hinweis: nur anzeigen, wenn (5) = "Ja"

- (d) Krankenschwester/Arzthelfer(in) bei anderem Augenarzt  
 (e) keine Informationen erhalten  
 Ungestützt: Patient weiß es nicht / macht keine Angaben

**Telefonanruf nach Initialvisite**

- 7) Wurden Ihnen diese Informationen so gegeben, dass Sie sie mit nach Hause nehmen konnten (z. B. als Faltblatt)?  
EDC-Hinweis: nur anzeigen, wenn (5) = "Ja"
- Nein                       Ja                       Ungestützt: Patient weiß es nicht / macht keine Angaben
- 8) Wie hilfreich/verständlich waren die Aufklärung und die Informationen zur Augenerkrankung, die Ihnen gegeben wurden, für Sie?  
EDC-Hinweis: nur anzeigen, wenn (5) = "Ja"
- Absolut hilfreich und verständlich  
 Teilweise hilfreich und verständlich  
 Überhaupt nicht hilfreich und verständlich  
 Ungestützt: Patient weiß es nicht/Patient macht keine Angaben
- 9) Wurden Ihre Begleitpersonen/Angehörigen über Ihre Erkrankung und Behandlung informiert?  
Interviewer-Hinweis: keine Begleitperson anwesend
- Nein                       Ja                       nicht zutreffend                       Ungestützt: Patient weiß es nicht / macht keine Angaben

**Adhärenzbezogene Fragen**

- 10) Benötigen Sie Unterstützung von Angehörigen oder Begleitpersonen, um Ihre Termine zum Spritzen und/oder Kontrolltermine (für Sehtests, OCT-/Schichtaufnahmen der Netzhaut) wahrnehmen zu können? z.B. Begleitung zum Termin/Unterstützung bei der An-/Abreise
- Nein *(weiter mit 11)*                       Ja                       Ungestützt: Patient weiß es nicht / macht keine Angaben
- 11) Was erwarten Sie von der Behandlung?
- a) Verbesserung der Sehkraft  
 b) keine Verschlechterung der Sehkraft  
 c) Anderes, nämlich:  
 .....  
 d) Ungestützt: Patient hat keinerlei Erwartungen  
 e) Ungestützt: Patient weiß es nicht / macht keine Angaben

## Patientenfragebogen zur Bestimmung von Faktoren, die die Adhärenz/ Persistenz bei der Therapie mit Aflibercept als intravitreale Injektion beeinflussen

*Lieber Interviewer, bei "Patient weiß es nicht" kann von einer ungestützten Antwortmöglichkeit ausgegangen werden. Wählen Sie ungestützte Antwortmöglichkeiten nur aus, wenn der Befragte keine der anderen Antwortmöglichkeiten auswählen kann.*

EDC-Hinweis:

(\*) wenn die Antwort auf Frage (1) "Nein" ist, sollten alle mit einem Sternchen markierten Fragen in Vergangenheit gestellt werden

### Adhärenzbezogene Fragen

1) Haben Sie zu Beginn der Behandlung 3 Spritzen in monatlichen Abständen erhalten?       Nein                       Ja                       Ungestützt: Patient weiß es nicht / macht keine Angaben

2) Haben Sie bereits Ihre vierte Spritze erhalten?       Nein                       Ja                       Ungestützt: Patient weiß es nicht / macht keine Angaben

*Wenn Nein, ist bereits ein Termin dafür geplant?*       Nein                       Ja                       Ungestützt: Patient weiß es nicht / macht keine Angaben

3) Erhalten Sie zur Behandlung Ihrer Augenerkrankung weiterhin Spritzen ins Auge?       Nein                       Ja                       Ungestützt: Patient weiß es nicht / macht keine Angaben

*Wenn Ja, wurde in der Klinik/Praxis, in welcher Sie die Spritzen ins Auge erhalten, mit Ihnen über den Behandlungsverlauf gesprochen (z. B. geplante Anzahl an Spritzen im ersten Behandlungsjahr)?*       Nein                       Ja                       Ungestützt: Patient weiß es nicht / macht keine Angaben

EDC-Hinweis: nur anzeigen, wenn Antwort auf 3) "Ja" ist

*Wenn Ja, wie viele Spritzen erwarten Sie im 1. Jahr Ihrer Behandlung insgesamt?*       Ungestützt: Patient erwartet, keine Injektionen mehr zu erhalten, bisher hat er bereits folgende Anzahl Injektionen erhalten:

*EDC-Hinweis: nur anzeigen, wenn Antwort auf vorherige Frage "Ja" ist*       Ungestützt: Patient erwartet noch Injektionen - insgesamt rechnet er mit folgender Anzahl Injektionen im 1. Jahr:

Ungestützt: Patient weiß es nicht/kann Frage nicht beantworten



**Folgegespräch nach 4 Monaten**

wenn Ja, geben Sie bitte den Grund oder die Gründe an

- Wegstrecke zum Zentrum (Praxis/Klinik)
- Unterstützung benötigt
- Zeitaufwand ist zu groß
- Kosten
- Anderer Grund, *bitte angeben*

.....  
 Ungestützt: Patient weiß es nicht / macht keine Angaben

- 7) Haben Sie schon einmal einen Termin bei Ihrem behandelnden Augenarzt versäumt oder abgesagt?

*Interviewer-Hinweis: Sollte Patient fragen, welcher Augenarzt gemeint (Injizierender Arzt oder Hausaugenarzt/Zuweiser) bitte darauf hinweisen, dass sich die Frage auf beide Augenärzte bezieht.*

- Nein *weiter mit 8)*
- Ja welche Termine?
  - Spritzentermin
  - Termin zur Kontrolluntersuchung im Anschluss an die Spritze ins Auge
  - Termin zur Untersuchung meiner Augen/meiner Sehkraft/OCT-Untersuchungen (=Schichtaufnahme der Netzhaut)
- Ungestützt: Patient weiß es nicht / macht keine Angaben

Wenn Ja, geben Sie bitte Gründe für die versäumten oder abgesagten Termine an

*EDC-Hinweis: nur anzeigen, wenn Antwort auf 7) "Ja" ist*

- Fehlende Unterstützung durch Angehörige oder Betreuungspersonen
- Andere Erkrankung
- Den Termin einfach vergessen
- Anderer Grund, *bitte angeben*

.....  
 Ungestützt: Patient weiß es nicht / macht keine Angaben

**Organisation der Termine/Behandlung**

- 8)\* Wie werden im Allgemeinen / in der Regel die Termine in der Klinik/Praxis, in der Sie Ihre Spritzen erhalten, vereinbart?

- a) Nach einer Spritze wird bereits der Termin für die nächste Spritze vereinbart
- b) Meine Augen werden regelmäßig durch einen Augenarzt kontrolliert (Sehtests/OCT-Untersuchungen) und der Arzt beurteilt dann, ob ich eine weitere Spritze ins Auge benötige
- c) Anderes wie folgt

.....  
 Ungestützt: Patient weiß es nicht / macht keine Angaben

- 9)\* Findet die Untersuchung Ihrer Augen zur Einschätzung Ihrer Sehkraft bzw. Augenerkrankung am selben Tag statt, wie eine gegebenenfalls notwendige Spritzengabe?

- Nein
- Ja
- Teils, teils / unterschiedlich
- Ungestützt: Patient weiß es nicht / macht keine Angaben

- 10)\* Erinnerst die Klinik/Praxis, in der Sie die Spritzen erhalten, Sie an geplante Termine?

- Nein
- Ja
- Ungestützt: Patient weiß es nicht / macht keine Angaben

**Folgegespräch nach 4 Monaten**

---

Wenn *Nein*, würden Sie sich ein Erinnerungssystem wünschen?

Nein

Ja

Ungestützt: Patient weiß es nicht / macht keine Angaben

11)\* Wie schnell erhalten Sie Ersatztermine, falls Sie Termine zum Spritzen absagen müssen?

Dieser Fall ist noch nie eingetreten/Beurteilung nicht möglich

Neuen Termin innerhalb einer Woche erhalten

Neuen Termin innerhalb der nächsten zwei Wochen erhalten

Neuen Termin innerhalb der nächsten 4 Wochen erhalten

Neuer Termin konnte erst nach mehr als 4 Wochen vereinbart werden

Anderes wie folgt:

.....  
 Ungestützt: Patient weiß es nicht / macht keine Angaben



## Patientenfragebogen zur Bestimmung von Faktoren, die die Adhärenz/ Persistenz bei der Therapie mit Aflibercept als intravitreale Injektion beeinflussen

*Lieber Interviewer, bei "Patient weiß es nicht" kann von einer ungestützten Antwortmöglichkeit ausgegangen werden. Wählen Sie ungestützte Antwortmöglichkeiten nur aus, wenn der Befragte keine der anderen Antwortmöglichkeiten auswählen kann.*

EDC-Hinweis:

(\* ) wenn die Antwort auf Frage (1) "Nein" ist, sollten alle mit einem Stenchen markierten Fragen in Vergangenheit gestellt werden

### Adhärenzbezogene Fragen

1) Erhalten Sie zur Behandlung Ihrer Augenerkrankung weiterhin Spritzen ins Auge?  Nein  Ja  Ungestützt: Patient weiß es nicht / macht keine Angaben

*Wenn Ja*, wurde in der Klinik/Praxis, in welcher Sie die Spritzen ins Auge erhalten, mit Ihnen über den Behandlungsverlauf gesprochen (z. B. geplante Anzahl an Spritzen im zweiten Behandlungsjahr)?  Nein  Ja  Ungestützt: Patient weiß es nicht / macht keine Angaben

EDC-Hinweis: nur anzeigen, wenn Antwort auf 1) "Ja" ist

*Wenn Ja*, wie viele Spritzen erwarten Sie im 2. Jahr Ihrer Behandlung insgesamt?  Ungestützt: Patient erwartet, keine Injektionen mehr zu erhalten, bisher hat er bereits folgende Anzahl Injektionen erhalten:   
 Ungestützt: Patient erwartet noch Injektionen - insgesamt rechnet er mit folgender Anzahl Injektionen im 2. Jahr:

EDC-Hinweis: nur anzeigen, wenn Antwort auf vorherige Frage "Ja" ist

Ungestützt: Patient weiß es nicht / kann Frage nicht beantworten  Ungestützt: Patient weiß es nicht / macht keine Angaben

wenn Nein, wann wurde die Therapie beendet?  **2, 0**  
Tag    Monat    Jahr

*Interviewer-Hinweis: Zeitpunkt der letzten Spritze oder Zeitpunkt letzter Kontrolltermin (Sehtest/OCT-Untersuchung/Schichtaufnahme Netzhaut)*

EDC-Hinweis: nur anzeigen, wenn Antwort auf 1) "Nein" ist

*Interviewer-Hinweis: Monat und Jahr genügt*

Folgegespräch nach 12 Monaten

wenn Nein, was war der Hauptgrund für das Therapieende?

*EDC-Hinweis: nur anzeigen, wenn Antwort auf 1) "Nein" ist*

- a) Entscheidung des behandelnden Augenarztes: Behandlung ist nicht mehr notwendig, die Krankheit ist stabil / die Behandlung ist nicht mehr hilfreich.
- b) Eigene Entscheidung: Schwierigkeiten bei der Organisation der Arzttermine, z.B. keine Möglichkeit der Unterstützung durch Angehörige oder Betreuungspersonen.
- c) Eigene Entscheidung: ich kann keinen Nutzen der Behandlung erkennen.
- d) Anderer Grund:

wenn Nein, wird Ihre Makulaerkrankung noch regelmäßig kontrolliert (Sehtests/OCT-Untersuchungen=Schichtaufnahmen der Netzhaut)?

*EDC-Hinweis: nur anzeigen, wenn Antwort auf 1) "Nein" ist*

- Nein
- Ja
- Ungestützt: Patient weiß es nicht / macht keine Angaben

2)\* Wie aufwendig ist für Sie die Organisation der Behandlungstermine?

- überhaupt nicht aufwendig
- etwas aufwendig
- sehr aufwendig

3)\* Werden Sie von Angehörigen oder Begleitpersonen unterstützt, um Ihre Termine zum Spritzen und/oder Kontrolltermine (für Sehtests, OCT-/Schichtaufnahmen der Netzhaut) wahrnehmen zu können? z.B. Begleitung zum Termin/Unterstützung bei der An-/Abreise?

- Nein
- Ja
- Ungestützt: Patient weiß es nicht / macht keine Angaben

4)\* Gibt es einen Umstand, der Sie daran hindert, regelmäßig Ihre geplanten Termine beim behandelnden Augenarzt wahrzunehmen?

- Nein *weiter mit 5)*
- Ja
- Ungestützt: Patient weiß es nicht / macht keine Angaben

wenn Ja, geben Sie bitte den Grund oder die Gründe an

- Wegstrecke zum Zentrum (Praxis/Klinik)
- Unterstützung benötigt
- Zeitaufwand ist zu groß
- Kosten
- Anderer Grund, *bitte angeben*

5) Haben Sie schon einmal einen Termin bei Ihrem behandelnden Augenarzt versäumt oder abgesagt?

*Interviewer-Hinweis: Sollte Patient fragen, welcher Augenarzt gemeint (Injizierender Arzt oder Hausaugenarzt/Zuweiser) bitte darauf hinweisen, dass sich die Frage auf beide Augenärzte bezieht.*

- Nein *weiter mit 6)*
- Ja welche Termine?
  - Sprizentermin
  - Termin zur Kontrolluntersuchung im Anschluss an die Spritze ins Auge
  - Termin zur Untersuchung meiner Augen/meiner Sehkraft/OCT-Untersuchungen (=Schichtaufnahme der Netzhaut)
- Ungestützt: Patient weiß es nicht / macht keine Angaben

**Folgegespräch nach 12 Monaten**

Wenn Ja, wie oft?

EDC-Hinweis: nur anzeigen,  
wenn Antwort auf 5) "Ja" ist

- Selten (einmal im Jahr)  
 Gelegentlich (2- bis 3-mal im Jahr)  
 Häufig (mehr als 3-mal im Jahr)

Wenn Ja, geben Sie bitte Gründe für die versäumten oder abgesagten Termine an

EDC-Hinweis: nur anzeigen,  
wenn Antwort auf 5) "Ja" ist

- Fehlende Unterstützung durch Angehörige oder Betreuungspersonen  
 Andere Erkrankung  
 Den Termin einfach vergessen  
 Anderer Grund, *bitte angeben*

**Organisation der Termine/Behandlung**

- 6)\* Wie werden im Allgemeinen / in der Regel die Termine in der Klinik/Praxis, in der Sie Ihre Spritzen erhalten, vereinbart?
- a) Nach einer Spritze wird bereits der Termin für die nächste Spritze vereinbart  
 b) Meine Augen werden regelmäßig durch einen Augenarzt kontrolliert (Sehtests/OCT-Untersuchungen) und der Arzt beurteilt dann, ob ich eine weitere Spritze ins Auge benötige  
 c) Anderes wie folgt

Ungestützt: Patient weiß es nicht / macht keine Angaben

- 7)\* Findet die Untersuchung Ihrer Augen zur Einschätzung Ihrer Sehkraft bzw. Augenerkrankung am selben Tag statt, wie eine gegebenenfalls notwendige Spritzengabe?
- Nein                       Ja                       Teils, teils / unterschiedlich  
 Ungestützt: Patient weiß es nicht / macht keine Angaben

- 8)\* Wie schnell erhalten Sie Ersatztermine, falls Sie Termine zum Spritzen absagen müssen?
- Dieser Fall ist noch nie eingetreten/Beurteilung nicht möglich  
 Neuen Termin innerhalb einer Woche erhalten  
 Neuen Termin innerhalb der nächsten zwei Wochen erhalten  
 Neuen Termin innerhalb der nächsten 4 Wochen erhalten  
 Neuer Termin konnte erst nach mehr als 4 Wochen vereinbart werden  
 Anderes wie folgt:

Ungestützt: Patient weiß es nicht / macht keine Angaben

## Folgegespräch nach 12 Monaten

## Informationen zu Krankheit/Therapie

- 9)\* Bespricht Ihr behandelnder Augenarzt regelmäßig den Krankheitsverlauf und das Behandlungsergebnis mit Ihnen?  Nein  Ja  Ungestützt: Patient weiß es nicht / macht keine Angaben
- 10)\* Hat Ihr behandelnder Augenarzt mit Ihnen über den kommenden Behandlungsverlauf gesprochen?  Nein, ich weiß nicht wie es weitergeht  Ja, er hat mir erklärt, dass ich weitere Spritzen ins Auge erhalten muss  Ja, er hat mir erklärt, dass zunächst keine Spritzen erforderlich sind, ich aber regelmäßig zu Kontrollen muss  Ja, er hat mir erklärt, dass ich keine Spritzen mehr erhalten werde und weitere Kontrollen nicht notwendig sind  Anderes wie folgt:
- .....
- Ungestützt: Patient weiß es nicht / macht keine Angaben

## Patientenfragebogen zur Bestimmung von Faktoren, die die Adhärenz/ Persistenz bei der Therapie mit Aflibercept als intravitreale Injektion beeinflussen

*Lieber Interviewer, bei "Patient weiß es nicht" kann von einer ungestützten Antwortmöglichkeit ausgegangen werden. Wählen Sie ungestützte Antwortmöglichkeiten nur aus, wenn der Befragte keine der anderen Antwortmöglichkeiten auswählen kann.*

EDC-Hinweis:

(\*) wenn die Antwort auf Frage (1) "Nein" ist, sollten alle mit einem Stenchen markierten Fragen in Vergangenheit gestellt werden

### Adhärenzbezogene Fragen

- 1) Erhalten Sie zur Behandlung Ihrer Augenerkrankung weiterhin Spritzen ins Auge?  Nein  Ja  Ungestützt: Patient weiß es nicht / macht keine Angabe

wenn Nein, wann wurde die Therapie beendet?

|     |       |      |
|-----|-------|------|
| Tag | Monat | Jahr |
|     |       | 2, 0 |

*Interviewer-Hinweis: Zeitpunkt der letzten Spritze oder Zeitpunkt letzter Kontrolltermin (Sehtest/OCT-Untersuchung/Schichtaufnahme Netzhaut)*

*Interviewer-Hinweis: Monat und Jahr genügt*

EDC-Hinweis: nur anzeigen, wenn Antwort auf 1) "Nein" ist

- Ungestützt: Patient weiß es nicht / macht keine Angaben

wenn Nein, was war der Hauptgrund für das Therapieende?

EDC-Hinweis: nur anzeigen, wenn Antwort auf 1) "Nein" ist

- a) Entscheidung des behandelnden Augenarztes: Behandlung ist nicht mehr notwendig, die Krankheit ist stabil / die Behandlung ist nicht mehr hilfreich.
- b) Eigene Entscheidung: Schwierigkeiten bei der Organisation der Arzttermine, z.B. keine Möglichkeit der Unterstützung durch Angehörige oder Betreuungspersonen.
- c) Eigene Entscheidung: ich kann keinen Nutzen der Behandlung erkennen.
- d) Anderer Grund:

wenn Nein, wird Ihre Makulaerkrankung noch regelmäßig kontrolliert (Sehtests/OCT-Untersuchungen=Schichtaufnahmen der Netzhaut)?

EDC-Hinweis: nur anzeigen, wenn Antwort auf 1) "Nein" ist

- Nein  Ja  Ungestützt: Patient weiß es nicht / macht keine Angaben

- 2)\* Wie aufwendig ist für Sie die Organisation der Behandlungstermine?  überhaupt nicht aufwendig  etwas aufwendig  sehr aufwendig

**Folgegespräch nach 24 Monaten**

3)\* Werden Sie von Angehörigen oder Begleitpersonen unterstützt, um Ihre Termine zum Spritzen und/oder Kontrolltermine (für Sehtests, OCT-/Schichtaufnahmen der Netzhaut) wahrnehmen zu können? z.B. Begleitung zum Termin/Unterstützung bei der An-/Abreise?

Nein
  Ja
  Ungestützt: Patient weiß es nicht / macht keine Angaben

4)\* Gibt es einen Umstand, der Sie daran hindert, regelmäßig Ihre geplanten Termine beim behandelnden Augenarzt wahrzunehmen?

Nein *weiter mit 5)*
 Ja
  Ungestützt: Patient weiß es nicht / macht keine Angaben

*wenn Ja*, geben Sie bitte den Grund oder die Gründe an

- Wegstrecke zum Zentrum (Praxis/Klinik)
- Unterstützung benötigt
- Zeitaufwand ist zu groß
- Kosten
- Anderer Grund, *bitte angeben*

5) Haben Sie schon einmal einen Termin bei Ihrem behandelnden Augenarzt versäumt oder abgesagt?

*Interviewer-Hinweis: Sollte Patient fragen, welcher Augenarzt gemeint (Injizierender Arzt oder Hausaugenarzt/Zuweiser) bitte darauf hinweisen, dass sich die Frage auf beide Augenärzte bezieht.*

Nein *weiter mit 6)*
 Ja *welche Termine?*
 Ungestützt: Patient weiß es nicht / macht keine Angaben

- Spritzentermin
- Termin zur Kontrolluntersuchung im Anschluss an die Spritze ins Auge
- Termin zur Untersuchung meiner Augen/meiner Sehkraft/ OCT-Untersuchungen (=Schichtaufnahme der Netzhaut)

*Wenn Ja*, wie oft?

EDC-Hinweis: nur anzeigen, wenn Antwort auf 5) "Ja" ist

- Selten (einmal im Jahr)
- Gelegentlich (2- bis 3-mal im Jahr)
- Häufig (mehr als 3-mal im Jahr)

*Wenn Ja*, geben Sie bitte Gründe für die versäumten oder abgesagten Termine an

EDC-Hinweis: nur anzeigen, wenn Antwort auf 5) "Ja" ist

- Fehlende Unterstützung durch Angehörige oder Betreuungspersonen
- Andere Erkrankung
- Den Termin einfach vergessen
- Anderer Grund, *bitte angeben*

**Folgegespräch nach 24 Monaten**
**Organisation der Termine/Behandlung**

- 6)\* Wie werden im Allgemeinen / in der Regel die Termine in der Klinik/Praxis, in der Sie Ihre Spritzen erhalten, vereinbart?
- a) Nach einer Spritze wird bereits der Termin für die nächste Spritze vereinbart  
 b) Meine Augen werden regelmäßig durch einen Augenarzt kontrolliert (Sehtests/OCT-Untersuchungen) und der Arzt beurteilt dann, ob ich eine weitere Spritze ins Auge benötige  
 c) Anderes wie folgt

.....  
 Ungestützt: Patient weiß es nicht / macht keine Angaben

- 7)\* Findet die Untersuchung Ihrer Augen zur Einschätzung Ihrer Sehkraft bzw. Augenerkrankung am selben Tag statt, wie eine gegebenenfalls notwendige Spritzengabe?
- Nein                       Ja                       Teils, teils / unterschiedlich  
 Ungestützt: Patient weiß es nicht / macht keine Angaben

- 8)\* Wie schnell erhalten Sie Ersatztermine, falls Sie Termine zum Spritzen absagen müssen?
- Dieser Fall ist noch nie eingetreten/Beurteilung nicht möglich  
 Neuen Termin innerhalb einer Woche erhalten  
 Neuen Termin innerhalb der nächsten zwei Wochen erhalten  
 Neuen Termin innerhalb der nächsten 4 Wochen erhalten  
 Neuer Termin konnte erst nach mehr als 4 Wochen vereinbart werden  
 Anderes wie folgt:

.....  
 Ungestützt: Patient weiß es nicht / macht keine Angaben

**Informationen zu Krankheit/Therapie**

- 9) Bespricht Ihr behandelnder Augenarzt regelmäßig den Krankheitsverlauf und das Behandlungsergebnis mit Ihnen?
- Nein                       Ja                       Ungestützt: Patient weiß es nicht / macht keine Angaben

- 10) Hat Ihr behandelnder Augenarzt mit Ihnen über den kommenden Behandlungsverlauf gesprochen?
- Nein, ich weiß nicht wie es weitergeht  
 Ja, er hat mir erklärt, dass ich weitere Spritzen ins Auge erhalten muss  
 Ja, er hat mir erklärt, dass zunächst keine Spritzen erforderlich sind, ich aber regelmäßig zu Kontrollen muss  
 Ja, er hat mir erklärt, dass ich keine Spritzen mehr erhalten werde und weitere Kontrollen nicht notwendig sind  
 Anderes wie folgt:

.....  
 Ungestützt: Patient weiß es nicht / macht keine Angaben
